# Supplementary material for: Recent progress in sono-photodynamic cancer therapy: From developed new sensitizers to nanotechnology-based efficacy-enhancing strategies
Source: PubMed Central journal article supplement — Acta Pharm Sin B. 2020 Dec 21;11(8):2197–219. doi: 10.1016/j.apsb.2020.12.016 (PMC8424231; doi:10.1016/j.apsb.2020.12.016), 2020-12-21
Supplement: mmc1.pdf [file mmc1.pdf]

**Supporting Information for**

**REVIEW**

**Recent progress in sono-photodynamic cancer therapy: From developed new sensitizers to nanotechnology-based efficacy-enhancing strategies**

**Yilin Zheng<sup>a,†</sup>, Jinxiang Ye<sup>b,†</sup>, Ziyang Li<sup>a</sup>, Haijun Chen<sup>b,\*</sup>, Yu Gao<sup>a,b,\*</sup>**

<sup>a</sup>*Cancer Metastasis Alert and Prevention Center, College of Chemistry, Fuzhou University, Fuzhou 350116, China*

<sup>b</sup>*Fujian Provincial Key Laboratory of Cancer Metastasis Chemoprevention and Chemotherapy, Fuzhou University, Fuzhou 350116, China*

Received 25 August 2020; received in revised form 27 September 2020; accepted 13 November 2020

†These authors made equal contributions to this work.

\*Corresponding authors.

E-mail addresses: [hellogaoyu@126.com](mailto:hellogaoyu@126.com) (Yu Gao), [chenhaij@gmail.com](mailto:chenhaij@gmail.com) (Haijun Chen).

**Table S1** Different NDDSs for enhanced SPDT.

| NP Platform   | Carrier material                    | Sensitizer | Light dose                                                                           | Ultrasonic dose                       | Cancer cell type | Species                            | Function                                                                                  | Ref. |
|---------------|-------------------------------------|------------|--------------------------------------------------------------------------------------|---------------------------------------|------------------|------------------------------------|-------------------------------------------------------------------------------------------|------|
| Polymeric NPs | FA-PEG-PLGA/<br>PVA/MNPs            | HMME       | –                                                                                    | 1 MHz,<br>3 W/cm <sup>2</sup> , 5 min | MDA-MB-231       | Female BALB/c<br>nude mice         | Tumor-targeted delivery<br>Integration of diagnosis and therapy                           | 1    |
|               | PEG-SS-Ce6-M<br>MP2                 | Ce6        | 633 nm<br>50 mW/cm <sup>2</sup> , 30 min                                             | –                                     | A549             | Female<br>BALB/c-nude mice         | Tumor-targeted delivery<br>Integration of diagnosis and therapy                           | 2    |
|               | PEG- <i>b</i> -PCL-TK-<br>PAMAM-ICG | Ce6        | 660 nm<br>0.3 W/cm <sup>2</sup> , 30 min<br>808 nm<br>1.0 W/cm <sup>2</sup> , 10 min | –                                     | 4T1              | Female BALB/c<br>nude mice         | Intratumoral delivery<br>Combination therapy                                              | 3    |
|               | UDCA-Cs                             | Ce6        | 664 nm<br>2 J/cm <sup>2</sup>                                                        | –                                     | HuCC-T1          | –                                  | Delivery across biological barriers                                                       | 4    |
|               | TPGS-CA-DOX                         | Ce6        | 633 nm<br>50 mW/cm <sup>2</sup> , 30 min                                             | –                                     | A549             | Female<br>BALB/c-nude mice         | Stimuli-responsive release<br>Combination therapy<br>Integration of diagnosis and therapy | 5    |
|               | CAT-Ce6/F-PEI                       | Ce6        | 660 nm<br>200 mW/cm <sup>2</sup> , 15 min                                            | –                                     | T24              | Female BALB/c<br>nude mice         | O <sub>2</sub> supply                                                                     | 6    |
|               | PLGA/PFP/OXP                        | ICG        | 808 nm<br>1.5 W/cm <sup>2</sup> , 2 min                                              | 1.0 W/cm <sup>2</sup> , 1 min         | ID8              | Female C57BL/6<br>mice             | Immunity modulation<br>Combination therapy<br>Integration of diagnosis and therapy        | 7    |
|               | PLGA/PFP/PTX                        | ICG        | 808 nm<br>1.5W/cm <sup>2</sup> , 5 min                                               | 1 MHz,<br>1 W/cm <sup>2</sup> , 1 min | SKOV3            | Female BALB/c<br>athymic nude mice | O <sub>2</sub> supply<br>Combination therapy<br>Integration of diagnosis and therapy      | 8    |
|               | CRGDK-PEG-P<br>CL/mPEG-PCL/         | IR780      | 808 nm<br>2 W/cm <sup>2</sup> , 20 s                                                 | –                                     | MDA-MB-231       | Female BALB/c<br>nude mice         | Tumor-targeted delivery<br>O <sub>2</sub> supply                                          | 9    |

|                    |                                                               |       |                                          |                                                            |            |                            |                                                                                        |    |
|--------------------|---------------------------------------------------------------|-------|------------------------------------------|------------------------------------------------------------|------------|----------------------------|----------------------------------------------------------------------------------------|----|
|                    | PFOB                                                          |       |                                          |                                                            |            |                            | Integration of diagnosis and therapy                                                   |    |
|                    | PEG-PCL/MET                                                   | IR780 | 808 nm<br>1 W/cm <sup>2</sup> , 5 min    | –                                                          | MKN-45P    | SCID nude mice             | O <sub>2</sub> supply<br>Combination therapy                                           | 10 |
|                    | FCs/CAT-TCPP                                                  | TCPP  | –                                        | 40 kHz,<br>3 W/cm <sup>2</sup> , 15 min                    | MB49       | C57 BL/6 mice              | Integration of diagnosis and therapy<br>O <sub>2</sub> supply                          | 11 |
|                    | HA-PLGA/<br>PLGA-HBA-5-A<br>LA/ART                            | 5-ALA | –                                        | 2 W/cm <sup>2</sup> , 60 s                                 | HepG2      | BALB/c nude mice           | Tumor-targeted delivery<br>Stimuli-responsive release<br>Combination therapy           | 12 |
|                    | PEGylated<br>Hp/DOX                                           | Hp    | 633 nm<br>5 J/cm <sup>2</sup>            | –                                                          | ADR/MCF-7  | Female BALB/c<br>nude mice | Stimuli-responsive release<br>Combination therapy                                      | 13 |
|                    | ALG-Pba/DOX                                                   | Pba   | 670 nm<br>200 J/cm <sup>2</sup>          | –                                                          | B16        | Female C57BL6<br>mice      | Stimuli-responsive release<br>Combination therapy                                      | 14 |
| Micelles           | CAT/Cs                                                        | Ce6   | 650 nm<br>12 J/cm <sup>2</sup>           | –                                                          | CAL-27     | Female BALB/c<br>nude mice | Stimuli-responsive release<br>O <sub>2</sub> supply                                    | 15 |
|                    | C <sub>18</sub> GR <sub>7</sub> RGDS/IC<br>G                  | ICG   | 808 nm<br>1.5 W/cm <sup>2</sup> , 3 min  | 1 MHz,<br>2.4 W/cm <sup>2</sup> , 5 min,<br>50% duty cycle | MDA-MB-231 | Male nude mice             | Intratumor delivery<br>Combination therapy                                             | 16 |
|                    | $\alpha$ -CD-Ce6/ $\alpha$ -CD<br>-NO/PEG- <i>b</i> -PM<br>PC | Ce6   | 660 nm<br>0.5 W, 5 min                   | –                                                          | MCF-7      | Female BALB/c<br>nude mice | O <sub>2</sub> supply<br>Combination therapy                                           | 17 |
| Lipid-based<br>NPs | DPPC/Cholester<br>ol/DSPE-PEG/D<br>SPE-PEG-iRGD/<br>DOTAP     | ICG   | 808 nm<br>1.0 W/cm <sup>2</sup> , 10 min | –                                                          | Hep-2      | Male SCID mice             | Tumor-targeted delivery<br>Combination therapy<br>Integration of diagnosis and therapy | 18 |
|                    | DPPC/DPPG/DS                                                  | ICG   | 808 nm                                   | 300 kHz,                                                   | SKOV3      | Female BALB/c              | Tumor-targeted delivery                                                                | 19 |

|                   |                                                       |       |                                        |                                                       |         |                                 |                                                                                                                 |    |
|-------------------|-------------------------------------------------------|-------|----------------------------------------|-------------------------------------------------------|---------|---------------------------------|-----------------------------------------------------------------------------------------------------------------|----|
|                   | PE-PEG-FA/Cholesterol/PFH                             |       | 1.5 W/cm <sup>2</sup> , 5 min          | 1 W/cm <sup>2</sup> , 30 s                            |         | nude mice                       | Combination therapy<br>Integration of diagnosis and therapy                                                     |    |
|                   | DPPC/DPPG/DSPE-PEG-FA/Cholesterol/PFP                 | IR780 | –                                      | 2.4 W/cm <sup>2</sup> , on 3 min, off 3 min, 4 cycles | 4T1     | BALB/c nude mice                | Delivery across biological barriers<br>Integration of diagnosis and therapy                                     | 20 |
|                   | DPPC/DSPE-PEG-iRGD/Cholesterol                        | DVDMS | –                                      | 1.0 MHz, 0.6 W/cm <sup>2</sup> , 1 min                | C6      | BALB/c mice                     | Delivery across biological barriers<br>Tumor-targeted delivery                                                  | 21 |
|                   | DPPC/Cholesterol/DSPE-PEG/DVDMS(Mn)                   | DVDMS | –                                      | 0.5 MHz, 1.5 W/cm <sup>2</sup> , 10 min               | U87     | Female BALB/c athymic nude mice | Integration of diagnosis and therapy                                                                            | 22 |
|                   | DPPC/DSPE-PEG-FA/Cholesterol/UCNPs-RB/HCPT/PFH        | RB    | 980 nm, 2 W/cm <sup>2</sup> , 12 min   | –                                                     | SKOV3   | Female nude mice                | Tumor-targeted delivery<br>O <sub>2</sub> supply<br>Combination therapy<br>Integration of diagnosis and therapy | 23 |
| Protein-based NPs | cRGDfk-SF-Ce6/5-FU                                    | Ce6   | 650 nm, 50 mW/cm <sup>2</sup> , 30 min | –                                                     | MGC-803 | Male BALB/c-nude mice           | Tumor-targeted delivery<br>Combination therapy                                                                  | 24 |
|                   | HSA-Ce6/TAM                                           | Ce6   | 660 nm, 5 mW/cm <sup>2</sup> , 30 min  | –                                                     | 4T1     | Female nude mice                | Intratumor delivery<br>O <sub>2</sub> supply                                                                    | 25 |
|                   | Ce6-HSA-Azobenzene-4,4'-dicarboxylic acid-Oxa(IV)-HSA | Ce6   | 660 nm, 5 mW/cm <sup>2</sup> , 1 h     | –                                                     | 4T1     | Female BALB/c nude mice         | Intratumor delivery<br>Combination therapy                                                                      | 26 |
|                   | KALA/Apt/BSA                                          | ICG   | 808 nm                                 | –                                                     | MCF-7   | Female BALB/c                   | Tumor-targeted delivery                                                                                         | 27 |

|                   |                                         |                       |                                          |                                           |       |                    |                                                                         |    |
|-------------------|-----------------------------------------|-----------------------|------------------------------------------|-------------------------------------------|-------|--------------------|-------------------------------------------------------------------------|----|
|                   | /DOX                                    |                       | 1.0 W/cm <sup>2</sup> , 5 min            |                                           |       | nude mouse         | Combination therapy                                                     |    |
| Peptide-based NPs | TAT/IR780/DOX                           | IR780                 | 785 nm<br>1.0 W/cm <sup>2</sup> , 5 min  | –                                         | 4T1   | Female BALB/c mice | Integration of diagnosis and therapy<br>Tumor-targeted delivery         | 28 |
|                   | C <sub>18</sub> GR <sub>7</sub> RGDS/RB | RB                    | 808 nm<br>1.5 W/cm <sup>2</sup> , 3 min  | 1.0 MHz,<br>1.0 W/cm <sup>2</sup> , 50%   | HeLa  | Male nude mice     | Intratumoral delivery                                                   | 29 |
| Biomimetic NPs    | 4T1 cell membrane/ZIF-8/GSNO            | Ce6                   | –                                        | 1.0 MHz,<br>1.5 W/cm <sup>2</sup> , 5 min | 4T1   | Female BALB/c mice | O <sub>2</sub> supply<br>Combination therapy                            | 30 |
|                   | RBC membrane/ICG-HSA/PFTBA              | ICG                   | 808 nm<br>1 W/cm <sup>2</sup> , 3 min    | –                                         | CT26  | Male BALB/c mice   | Tumor-targeted delivery<br>O <sub>2</sub> supply<br>Combination therapy | 31 |
|                   | RBC membrane/Hb/DA                      | MB                    | 660 nm<br>220 mW/cm <sup>2</sup> , 5 min | –                                         | 4T1   | BALB/c mice        | O <sub>2</sub> supply                                                   | 32 |
|                   | RBC membrane/Pluronic F-127             | Ag <sub>2</sub> S QDs | –                                        | 1.0 MHz,<br>1.5 W/cm <sup>2</sup> , 5 min | C26   | BALB/c nude mice   | O <sub>2</sub> supply<br>Integration of diagnosis and therapy           | 33 |
|                   | RBC membrane/CAu NCs/HA/PXTK/dPPA       | Pba                   | 650 nm<br>270 mW/cm <sup>2</sup> , 4 min | –                                         | 4T1   | Female BALB/c mice | Intratumoral delivery<br>Combination therapy                            | 34 |
| Inorganic NPs     | PEGylated TPP-MS-HMME/Cu <sup>2+</sup>  | HMME                  | –                                        | 1 MHz,<br>0.75 W/cm <sup>2</sup> , 3 min  | HepG2 | –                  | Tumor-targeted delivery<br>Combination therapy                          | 35 |

|              |                                                  |                      |                                                                                      |                                                            |        |                            |                                                                                               |    |
|--------------|--------------------------------------------------|----------------------|--------------------------------------------------------------------------------------|------------------------------------------------------------|--------|----------------------------|-----------------------------------------------------------------------------------------------|----|
|              | HA-Mesoporous<br>CaCO <sub>3</sub>               | HMME                 | –                                                                                    | 1 MHz,<br>1 W/cm <sup>2</sup> , 1 min                      | MCF-7  | BALB/c nude mice           | Tumor-targeted delivery<br>Stimuli-responsive release<br>Integration of diagnosis and therapy | 36 |
|              | anti-EGFR-PEG-<br>TiO <sub>2</sub> -UCNPs        | TiO <sub>2</sub>     | 980 nm<br>1000 J/cm <sup>2</sup>                                                     | –                                                          | CAL-27 | Female BALB/c<br>nude mice | Tumor-targeted delivery                                                                       | 37 |
|              | Fe(OH) <sub>3</sub> /Silica/U<br>CNPs            | Ce6                  | 808 nm<br>1W/cm <sup>2</sup> , 30 min<br>(1 min interval after 5<br>min irradiation) | –                                                          | 4T1    | Male BALB/c mice           | O <sub>2</sub> supply<br>Combination therapy                                                  | 38 |
|              | Au <sub>2</sub> Pt-PEG-Ce6                       | Ce6                  | 808 nm<br>1 W/cm <sup>2</sup> , 5 min<br>650 nm<br>0.25 W/cm <sup>2</sup> , 5 min    | –                                                          | U14    | Female BALB/c<br>mice      | O <sub>2</sub> supply<br>Combination therapy<br>Integration of diagnosis and therapy          | 39 |
|              | PEGylated<br>$\beta$ -CD/Cu <sub>2-x</sub> Se    | Ce6                  | 808 nm<br>1.0 W/cm <sup>2</sup> , 10 min                                             | –                                                          | 4T1    | Male BALB/c mice           | O <sub>2</sub> supply<br>Combination therapy                                                  | 40 |
|              | BSA/Honeycom<br>b MnO <sub>2</sub>               | IR780                | 785 nm<br>1 W/cm <sup>2</sup> , 5 min                                                | –                                                          | HepG2  | Nude mice                  | O <sub>2</sub> supply<br>Combination therapy<br>Integration of diagnosis and therapy          | 41 |
|              | Pt-TiO <sub>2</sub> /DOX                         | TiO <sub>2</sub> NPs | –                                                                                    | 1 MHz,<br>1.5 W/cm <sup>2</sup> , 5 min,<br>50% duty cycle | 4T1    | Female BALB/c<br>mice      | O <sub>2</sub> supply<br>Combination therapy                                                  | 42 |
|              | HS-R8-PGGGA<br>G-EK10/<br>HS-hyd-5-ALA/<br>AuNPs | 5-ALA                | 635 nm<br>2840 mW/cm <sup>2</sup> , 6 min                                            | –                                                          | SCC-7  | Female ICR mice            | Tumor-targeted delivery<br>Stimuli-responsive release                                         | 43 |
| Metal-organi | LMWHA-PEI-M                                      | HMME                 | –                                                                                    | 3 MHz,                                                     | 4T1    | Female BALB/c              | Immunity modulation                                                                           | 44 |

|              |                                                            |      |                                           |                                                            |       |                         |                                                                                           |    |
|--------------|------------------------------------------------------------|------|-------------------------------------------|------------------------------------------------------------|-------|-------------------------|-------------------------------------------------------------------------------------------|----|
| c frameworks | PB                                                         |      |                                           | 1.0 W/cm <sup>2</sup> , 1 min                              |       | mice                    | O <sub>2</sub> supply                                                                     |    |
| Hybrid NPs   | p-(OEOMA-co-MEMA)/Pt-CuS                                   | TAPP | –                                         | 1 MHz,<br>1.0 W/cm <sup>2</sup> , 5 min,<br>60% duty cycle | CT26  | Female BALB/c mice      | O <sub>2</sub> supply<br>Combination therapy<br>Integration of diagnosis and therapy      | 45 |
|              | PEG-PDA/HIONs                                              | Hp   | –                                         | 1.0 MHz,<br>1.5 W/cm <sup>2</sup> , 10 min                 | PC-3  | Male BALB/c nu/nu mice  | O <sub>2</sub> supply<br>Combination therapy                                              | 46 |
|              | FA-Cs-GPTMS-HMSNs/DOX                                      | Pba  | 680 nm<br>0.5 W/cm <sup>2</sup> , 5 min   | –                                                          | KB    | Female BALB/c nude mice | Tumor-targeted delivery<br>Stimuli-responsive release<br>Combination therapy              | 47 |
|              | DPEG/CTPP/HSN                                              | Ce6  | 660 nm<br>5 mW/cm <sup>2</sup> , 1 h      | –                                                          | 4T1   | Female BALB/c mice      | Tumor-targeted delivery<br>Intratumoral delivery<br>O <sub>2</sub> supply                 | 48 |
|              | PC/PE-p-(His) <sub>40</sub> /PE-p(NIPAM) <sub>40</sub> -FA | Ce6  | 664 nm<br>1.0 J/cm <sup>2</sup>           | –                                                          | KB    | –                       | Tumor-targeted delivery<br>Stimuli-responsive release                                     | 49 |
|              | HCCP/HPS/Curcumin/Fe <sub>3</sub> O <sub>4</sub>           | Ce6  | 660 nm<br>100 mW/cm <sup>2</sup> , 15 min | –                                                          | HeLa  | BALB/c mice             | Stimuli-responsive release<br>Combination therapy<br>Integration of diagnosis and therapy | 50 |
|              | PEGylated HSA/PLL                                          | Ce6  | 635 nm<br>0.2 W/cm <sup>2</sup> , 10 min  | –                                                          | MCF-7 | Female BALB/c-nu mice   | Stimuli-responsive release                                                                | 51 |
|              | Lipid bilayer/CaCO <sub>3</sub> /DOX/Ce6(Mn)               | Ce6  | 660 nm<br>5 mW/cm <sup>2</sup> , 1 h      | –                                                          | 4T1   | Female BALB/c mice      | Stimuli-responsive release<br>Combination therapy<br>Integration of diagnosis and therapy | 52 |
|              | Er-Cs/MSN/ZnO QDs                                          | ICG  | 808 nm<br>1.0 W/cm <sup>2</sup> , 5 min   | –                                                          | PC-9  | BALB/c nude mice        | Stimuli-responsive release<br>Combination therapy<br>Integration of diagnosis and therapy | 53 |

|                               |       |                                |                                                                         |           |                         |                                      |    |
|-------------------------------|-------|--------------------------------|-------------------------------------------------------------------------|-----------|-------------------------|--------------------------------------|----|
| DPPC/DPPG/DS                  | ICG   | 808 nm                         | 1 W/cm <sup>2</sup> , 1 min                                             | SKOV3     | –                       | Integration of diagnosis and therapy | 54 |
| PE-PEG-FA/PLGA/PFP            |       |                                | 1.5 W/cm <sup>2</sup> , 2 min                                           |           |                         |                                      |    |
| PC/Cholesterol/DSPE-PEG/AuNPs | ZnPc  | 630–700 nm                     | –                                                                       | MCF-7     | Female SD rats          | Stimuli-responsive release           | 55 |
|                               |       | 30 mW/cm <sup>2</sup> , 20 min |                                                                         |           |                         | Combination therapy                  |    |
|                               |       |                                |                                                                         |           |                         | Integration of diagnosis and therapy |    |
| FC/HMONs                      | IR780 | –                              | 1 MHz,<br>1.0 W/cm <sup>2</sup> , 20 s,<br>9 cycles,<br>100% duty cycle | PANC-1    | Nude mice               | O <sub>2</sub> supply                | 56 |
| RGD-PEG-HMO                   | PpIX  | –                              | 1 MHz,<br>1.5 W/cm <sup>2</sup> , 5 min<br>50% duty cycle               | SMMC-7721 | Male BALB/c nude mice   | Tumor-targeted delivery              | 57 |
| Ns-PpIX/DOX                   |       |                                |                                                                         |           |                         | Combination therapy                  |    |
| FA-PEG-ZIF-90-DOX/MS/UCNP     | RB    | 808 nm                         | –                                                                       | H22       | Female BALB/c nude mice | O <sub>2</sub> supply                | 58 |
|                               |       | 0.5 W/cm <sup>2</sup> , 5 min, |                                                                         |           |                         | Combination therapy                  |    |
|                               |       |                                |                                                                         |           |                         | Integration of diagnosis and therapy |    |

NPs, nanoparticles; PEG, polyethylene glycol; PLGA, poly(lactic-*co*-glycolic) acid; FA, folate/folic acid; PVA, poly(vinyl alcohol); MNPs, melanin nanoparticles; HMME, hematoporphyrin monomethyl ether; Ce6, chlorin e6; MMP2, matrix metalloproteinase 2; PEG-*b*-PCL, PEG-*b*-poly( $\epsilon$ -caprolactone); TK, thioketal; PAMAM, poly(amidoamine) dendrimer; ICG, indocyanine green; UDCA, ursodeoxycholic acid; Cs, chitosan; TPGS, D- $\alpha$ -tocopheryl polyethylene glycol 1000 succinate; CA, *cis*-aconitic anhydride; DOX, doxorubicin; CAT, catalase; F-PEI, fluorinated polyethylenimine; PFP, perfluoropentane; OXP, oxaliplatin; PTX, paclitaxel; CRGDK, Cys-Arg-Gly-Asp-Lys; CRGDK-PEG-PCL, CRGDK modified PEG-PCL; mPEG-PCL, methoxy-PEG-PCL; PFOB, perfluorooctyl bromide; MET, metformin; FCs, fluorinated chitosan; TCPP, meso-tetra(4-carboxyphenyl) porphine; HA, hyaluronic acid; 5-ALA, 5-aminolevulinic acid; HBA, 4-hydrazinobenzoic acid; ART, artemisinin; Hp, hematoporphyrin; ALG, alginate; Pba, pheophorbide a;  $\alpha$ -CD,  $\alpha$ -cyclodextrin; PEG-*b*-PMPC, PEG-*b*-poly(2-methacryloyloxyethyl phosphorylcholine); DPPC, dipalmitoylphosphatidylcholine; DSPE-PEG, 1,2-distearoyl-sn-glycero-3-glycero-3-phosphoethanolamine-*N*-polyethyleneglycol; iRGD, internalized RGD, CRGDKGPCD; DSPE-PEG-iRGD, iRGD modified DSPE-PEG; DOTAP, 1,2-dioleoyl-3-trimethylammonium-propane (chloride salt); DPPG, 1,2-dipalmitoyl-*sn*-glycero-3-phospho-(1'-*rac*-glycerol); DSPE-PEG-FA, 1,2-distearoyl-*sn*-glycero-3-phosphoethanolamine-*N*-[folate(polyethyleneglycol)]; PFH, perfluorohexane; DVDMS, sinoporphyrin sodium; DVDMS (Mn), manganese ions (Mn<sup>2+</sup>)-chelated DVDMS; HCPT, 10-hydroxycamptothecin; RB, rose bengal; SF, silk fibroin; 5-FU, 5-fluorouracil; HSA, human serum albumin; TAM, tamoxifen; Oxa(IV),





## References

1. Huang J, Liu FQ, Han XX, Zhang L, Hu ZQ, Jiang QQ, et al. Nanosensitizers for highly efficient sonodynamic cancer theranostics. *Theranostics* 2018;**8**:6178-94.
2. Hou WX, Xia FF, Alves CS, Qian XQ, Yang YM, Cui DX. MMP2-targeting and redox-responsive PEGylated chlorin e6 nanoparticles for cancer near-infrared imaging and photodynamic therapy. *ACS Appl Mater Interfaces* 2016;**8**:1447-57.
3. Wang KW, Tu YL, Yao W, Zong QY, Xiao X, Yang RM, et al. Size-switchable nanoparticles with self-destructive and tumor penetration characteristics for site-specific phototherapy of cancer. *ACS Appl Mater Interfaces* 2020;**12**:6933-43.
4. Lee HM, Jeong YI, Kim DH, Kwak TW, Chung CW, Kim CH, et al. Ursodeoxycholic acid-conjugated chitosan for photodynamic treatment of HuCC-T1 human cholangiocarcinoma cells. *Int J Pharm* 2013;**454**:74-81.
5. Hou WX, Zhao X, Qian XQ, Pan F, Zhang CL, Yang YM, et al. pH-sensitive self-assembling nanoparticles for tumor near-infrared fluorescence imaging and chemo-photodynamic combination therapy. *Nanoscale* 2016;**8**:104-16.
6. Li G, Yuan S, Deng D, Ou T, Li Y, Sun R, et al. Fluorinated polyethylenimine to enable transmucosal delivery of photosensitizer-conjugated catalase for photodynamic therapy of orthotopic bladder tumors postintravesical instillation. *Adv Funct Mater* 2019;**29**:1901932.
7. Xie W, Zhu S, Yang BY, Chen CY, Chen SN, Liu YJ, et al. The destruction of laser-induced phase-transition nanoparticles triggered by low-intensity ultrasound: An innovative modality to enhance the immunological treatment of ovarian cancer cells. *Int J Nanomedicine* 2019;**14**:9377-93.
8. Chen SN, Liu YJ, Zhu SY, Chen CY, Xie W, Xiao LL, et al. Dual-mode imaging and therapeutic effects of drug-loaded phase-transition nanoparticles combined with near-infrared laser and low-intensity ultrasound on ovarian cancer. *Drug Deliv* 2018;**25**:1683-93.
9. Zhao CY, Tong YJ, Li XL, Shao LH, Chen L, Lu JQ, et al. Photosensitive nanoparticles combining vascular-independent intratumor distribution and on-demand oxygen-depot delivery for enhanced cancer photodynamic therapy. *Small* 2018;**14**:e1703045.
10. Yang ZY, Wang JF, Liu S, Li XH, Miao LY, Yang B, et al. Defeating relapsed and refractory malignancies through a nano-enabled mitochondria-mediated respiratory inhibition and damage pathway. *Biomaterials* 2020;**229**:119580.
11. Li GZ, Wang SP, Deng DS, Xiao ZS, Dong ZL, Wang ZP, et al. Fluorinated chitosan to enhance transmucosal delivery of sonosensitizer-conjugated catalase for sonodynamic bladder cancer treatment post-intravesical instillation. *ACS Nano* 2020;**14**:1586-99.
12. Wang L, Hu YJ, Hao YW, Li L, Zheng CX, Zhao HJ, et al. Tumor-targeting core-shell structured nanoparticles for drug procedural controlled release and cancer sonodynamic combined therapy. *J Control Release* 2018;**286**:74-84.
13. Ren Y, Wang RR, Liu Y, Guo H, Zhou X, Yuan XB, et al. A hematoporphyrin-based delivery system for drug resistance reversal and tumor ablation. *Biomaterials* 2014;**35**:2462-70.
14. Zhang CN, Shi GN, Zhang JF, Niu J, Huang PS, Wang ZH, et al. Redox- and light-responsive

alginate nanoparticles as effective drug carriers for combinational anticancer therapy. *Nanoscale* 2017;**9**:3304-14.

15. Shen LY, Huang Y, Chen D, Qiu F, Ma C, Jin X, et al. pH-responsive aerobic nanoparticles for effective photodynamic therapy. *Theranostics* 2017;**7**:4537-50.

16. Liu Z, Li JP, Chen WN, Liu L, Yu FF. Light and sound to trigger the Pandora's box against breast cancer: A combination strategy of sonodynamic, photodynamic and photothermal therapies. *Biomaterials* 2020;**232**:119685.

17. Deng YY, Jia F, Chen SY, Shen ZD, Jin Q, Fu GS, et al. Nitric oxide as an all-rounder for enhanced photodynamic therapy: Hypoxia relief, glutathione depletion and reactive nitrogen species generation. *Biomaterials* 2018;**187**:55-65.

18. Wu D, Zhao Z, Wang N, Zhang XR, Yan HH, Chen XQ, et al. Fluorescence imaging-guided multifunctional liposomes for tumor-specific phototherapy for laryngeal carcinoma. *Biomater Sci* 2020;**8**:3443-53.

19. Liu YJ, Chen SN, Sun JC, Zhu SY, Chen CY, Xie W, et al. Folate-targeted and oxygen/indocyanine green-loaded lipid nanoparticles for dual-mode imaging and photo-sonodynamic/photothermal therapy of ovarian cancer *in vitro* and *in vivo*. *Mol Pharm* 2019;**16**:4104-20.

20. Zhang L, Yi HJ, Song J, Huang J, Yang K, Tan B, et al. Mitochondria-targeted and ultrasound-activated nanodroplets for enhanced deep-penetration sonodynamic cancer therapy. *ACS Appl Mater Interfaces* 2019;**11**:9355-66.

21. Sun Y, Wang HP, Wang P, Zhang K, Geng XR, Liu QH, et al. Tumor targeting DVDMS-nanoliposomes for an enhanced sonodynamic therapy of gliomas. *Biomater Sci* 2019;**7**:985-94.

22. Liu HM, Zhou MJ, Sheng ZH, Chen YK, Yeh CK, Chen WT, et al. Theranostic nanosensitizers for highly efficient MR/fluorescence imaging-guided sonodynamic therapy of gliomas. *J Cell Mol Med* 2018;**22**:5394-405.

23. Wang HY, Hou L, Li HL, Wang X, Cao Y, Zhang BY, et al. A nanosystem loaded with perfluorohexane and rose bengal coupled upconversion nanoparticles for multimodal imaging and synergetic chemo-photodynamic therapy of cancer. *Biomater Sci* 2020;**8**:2488-506.

24. Mao B, Liu C, Zheng W, Li X, Ge R, Shen H, et al. Cyclic cRGDFk peptide and chlorin e6 functionalized silk fibroin nanoparticles for targeted drug delivery and photodynamic therapy. *Biomaterials* 2018;**161**:306-20.

25. Yang ZJ, Chen Q, Chen JW, Dong ZL, Zhang R, Liu JJ, et al. Tumor-pH-responsive dissociable albumin–tamoxifen nanocomplexes enabling efficient tumor penetration and hypoxia relief for enhanced cancer photodynamic therapy. *Small* 2018;**14**:e1803262.

26. Yang GB, Phua SZF, Lim WQ, Zhang R, Feng LZ, Liu GF, et al. A hypoxia-responsive albumin-based nanosystem for deep tumor penetration and excellent therapeutic efficacy. *Adv Mater* 2019;**31**:e1901513.

27. Xu L, Wang SB, Xu C, Han D, Ren XH, Zhang XZ, et al. Multifunctional albumin-based delivery system generated by programmed assembly for tumor-targeted multimodal therapy and imaging. *ACS Appl Mater Interfaces* 2019;**11**:38385-94.

28. Wan GY, Cheng YY, Song J, Chen Q, Chen BW, Liu YY, et al. Nucleus-targeting near-infrared nanoparticles based on TAT peptide-conjugated IR780 for photo-chemotherapy of breast cancer. *Chem Eng J* 2020;**380**:122458.
29. Liu Z, Li JP, Jiang Y, Wang DD. Multifunctional nanocapsules on a seesaw balancing sonodynamic and photodynamic therapies against superficial malignant tumors by effective immune-enhancement. *Biomaterials* 2019;**218**:119251.
30. An J, Hu YG, Li C, Hou XL, Cheng K, Zhang B, et al. A pH/ultrasound dual-response biomimetic nanoplatform for nitric oxide gas-sonodynamic combined therapy and repeated ultrasound for relieving hypoxia. *Biomaterials* 2020;**230**:119636.
31. Ren H, Liu JQ, Li YQ, Wang HR, Ge SZ, Yuan AH, et al. Oxygen self-enriched nanoparticles functionalized with erythrocyte membranes for long circulation and enhanced phototherapy. *Acta Biomater* 2017;**59**:269-82.
32. Liu WL, Liu T, Zou MZ, Yu WY, Li CX, He ZY, et al. Aggressive man-made red blood cells for hypoxia-resistant photodynamic therapy. *Adv Mater* 2018;**30**:e1802006.
33. Li C, Yang XQ, An J, Cheng K, Hou XL, Zhang XS, et al. Red blood cell membrane-enveloped O<sub>2</sub> self-supplementing biomimetic nanoparticles for tumor imaging-guided enhanced sonodynamic therapy. *Theranostics* 2020;**10**:867-79.
34. Yu WQ, He XQ, Yang ZH, Yang XT, Xiao W, Liu R, et al. Sequentially responsive biomimetic nanoparticles with optimal size in combination with checkpoint blockade for cascade synergetic treatment of breast cancer and lung metastasis. *Biomaterials* 2019;**217**:119309.
35. Lin KC, Lin ZG, Li YJ, Zheng YS, Zhang D. Ultrasound-induced reactive oxygen species generation and mitochondria-specific damage by sonodynamic agent/metal ion-doped mesoporous silica. *RSC Advances* 2019;**9**:39924-31.
36. Feng QH, Zhang WX, Yang XM, Li YZ, Hao YW, Zhang HL, et al. pH/ultrasound dual-responsive gas generator for ultrasound imaging-guided therapeutic inertial cavitation and sonodynamic therapy. *Adv Healthc Mater* 2018;**7**:2192-659.
37. Lucky SS, Idris NM, Huang K, Kim J, Li Z, Thong PS, et al. *In vivo* biocompatibility, biodistribution and therapeutic efficiency of titania coated upconversion nanoparticles for photodynamic therapy of solid oral cancers. *Theranostics* 2016;**6**:1844-65.
38. Wu X, Yan PJ, Ren ZH, Wang YF, Cai XJ, Li X, et al. Ferric hydroxide-modified upconversion nanoparticles for 808 nm NIR-triggered synergetic tumor therapy with hypoxia modulation. *ACS Appl Mater Interfaces* 2019;**11**:385-93.
39. Wang M, Chang MY, Chen Q, Wang DM, Li CX, Hou ZY, et al. Au<sub>2</sub>Pt-PEG-Ce6 nanoformulation with dual nanozyme activities for synergistic chemodynamic therapy/phototherapy. *Biomaterials* 2020;**252**:120093.
40. Wang TT, Zhang H, Han YB, Liu HH, Ren F, Zeng JF, et al. Light-enhanced O<sub>2</sub>-evolving nanoparticles boost photodynamic therapy to elicit antitumor immunity. *ACS Appl Mater Interfaces* 2019;**11**:16367-79.
41. Liu XM, Tian K, Zhang JH, Zhao ML, Liu SJ, Zhao Q, et al. Smart NIR-light-mediated nanotherapeutic agents for enhancing tumor accumulation and overcoming hypoxia in synergistic

- cancer therapy. *ACS Applied Bio Materials*. 2019;**2**:1225-32.
42. Liang S, Deng XR, Xu GY, Xiao X, Wang MF, Guo XS, et al. A novel Pt-TiO<sub>2</sub> heterostructure with oxygen-deficient layer as bilaterally enhanced sonosensitizer for synergistic chemo-sonodynamic cancer therapy. *Adv Funct Mater* 2020;**30**:1908598.
43. Wu JN, Han HJ, Jin Q, Li ZH, Li H, Ji J. Design and proof of programmed 5-aminolevulinic acid prodrug nanocarriers for targeted photodynamic cancer therapy. *ACS Appl Mater Interfaces* 2017;**9**:14596-605.
44. Zhang HJ, Zhang XG, Ren YP, Cao F, Hou L, Zhang ZZ. An *in situ* microenvironmental nano-regulator to inhibit the proliferation and metastasis of 4T1 tumor. *Theranostics* 2019;**9**:3580-94.
45. Liang S, Deng XR, Chang Y, Sun CQ, Shao S, Xie ZX, et al. Intelligent hollow Pt-CuS Janus architecture for synergistic catalysis-enhanced sonodynamic and photothermal cancer therapy. *Nano Lett* 2019;**19**:4134-45.
46. Zhang Y, Xu YJ, Sun D, Meng ZY, Ying WW, Gao W, et al. Hollow magnetic nanosystem-boosting synergistic effect between magnetic hyperthermia and sonodynamic therapy *via* modulating reactive oxygen species and heat shock proteins. *Chem Eng J* 2020;**390**:124521.
47. Yan TS, He JM, Liu RM, Liu ZH, Cheng JJ. Chitosan capped pH-responsive hollow mesoporous silica nanoparticles for targeted chemo-photo combination therapy. *Carbohydr Polym* 2020;**231**:115706.
48. Yang GB, Xu LG, Xu J, Zhang R, Song GS, Chao Y, et al. Smart nanoreactors for pH-responsive tumor homing, mitochondria-targeting, and enhanced photodynamic-immunotherapy of cancer. *Nano Lett* 2018;**18**:2475-84.
49. John JV, Chung CW, Johnson RP, Jeong YI, Chung KD, Kang DH, et al. Dual stimuli-responsive vesicular nanospheres fabricated by lipopolymer hybrids for tumor-targeted photodynamic therapy. *Biomacromolecules* 2016;**17**:20-31.
50. Jing XN, Zhi Z, Jin LM, Wang F, Wu YS, Wang DQ, et al. pH/redox dual-stimuli-responsive cross-linked polyphosphazene nanoparticles for multimodal imaging-guided chemo-photodynamic therapy. *Nanoscale* 2019;**11**:9457-67.
51. Zhang N, Zhao FF, Zou QL, Li YX, Ma GH, Yan XH. Multitrigged tumor-responsive drug delivery vehicles based on protein and polypeptide coassembly for enhanced photodynamic tumor ablation. *Small* 2016;**12**:5936-43.
52. Dong ZL, Feng LZ, Zhu WW, Sun XQ, Gao M, Zhao H, et al. CaCO<sub>3</sub> nanoparticles as an ultra-sensitive tumor-pH-responsive nanoplatform enabling real-time drug release monitoring and cancer combination therapy. *Biomaterials* 2016;**110**:60-70.
53. Zhang YY, Zhang L, Lin XW, Ke LJ, Li BF, Xu L, et al. Dual-responsive nanosystem for precise molecular subtyping and resistant reversal of EGFR targeted therapy. *Chem Eng J* 2019;**372**:483-95.
54. Chen CY, Sun JC, Chen SN, Liu YJ, Zhu SY, Wang ZG, et al. A multifunctional-targeted nanoagent for dual-mode image-guided therapeutic effects on ovarian cancer cells. *Int J Nanomedicine* 2019;**14**:753-69.
55. Thakur NS, Patel G, Kushwah V, Jain S, Banerjee UC. Self-assembled gold nanoparticle–lipid nanocomposites for on-demand delivery, tumor accumulation, and combined

- photothermal–photodynamic therapy. *ACS Applied Bio Materials* 2018;**2**:349-61.
56. Chen J, Luo HL, Liu Y, Zhang W, Li HX, Luo T, et al. Oxygen-self-produced nanoplatfrom for relieving hypoxia and breaking resistance to sonodynamic treatment of pancreatic cancer. *ACS Nano* 2017;**11**:12849-62.
57. Li ZL, Han J, Yu LD, Qian XQ, Xing H, Lin H, et al. Synergistic sonodynamic/chemotherapeutic suppression of hepatocellular carcinoma by targeted biodegradable mesoporous nanosonosensitizers. *Adv Funct Mater* 2018;**28**:1800145.
58. Xie ZX, Cai XC, Sun CQ, Liang S, Shao S, Huang SS, et al. O<sub>2</sub>-loaded pH-responsive multifunctional nanodrug carrier for overcoming hypoxia and highly efficient chemo-photodynamic cancer therapy. *Chem Mater* 2018;**31**:483-90.
